# Supplementary material for: A “worm”-containing viscoelastic fluid based on single amine oxide surfactant with an unsaturated C22-tail
Source: Royal Society of Chemistry journal article supplement (doi:10.1039/c4ra16772d), 2015-01-01
Supplement: c4ra16772d1.pdf [file c4ra16772d1.pdf]

## Worm-containing viscoelastic fluid based on single amine oxide surfactant with an unsaturated C<sub>22</sub>-tail

Yongmin Zhang\*, Pengyun An, Xuefeng Liu

Key Laboratory of Food Colloids and Biotechnology Ministry of Education, School of Chemical & Materials Engineering, Jiangnan University, 214122 Wuxi, People's Republic of China

### 1 Additional results

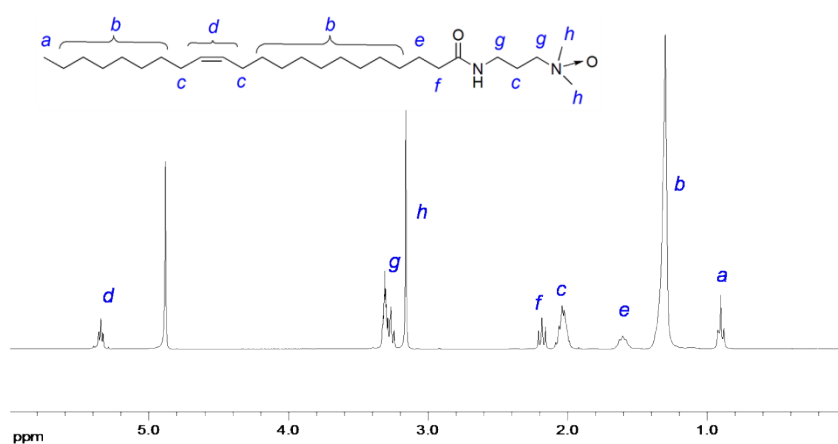

2  
3 **Figure S1** <sup>1</sup>H NMR spectra for EMAO using CD<sub>3</sub>OD as the solvent.

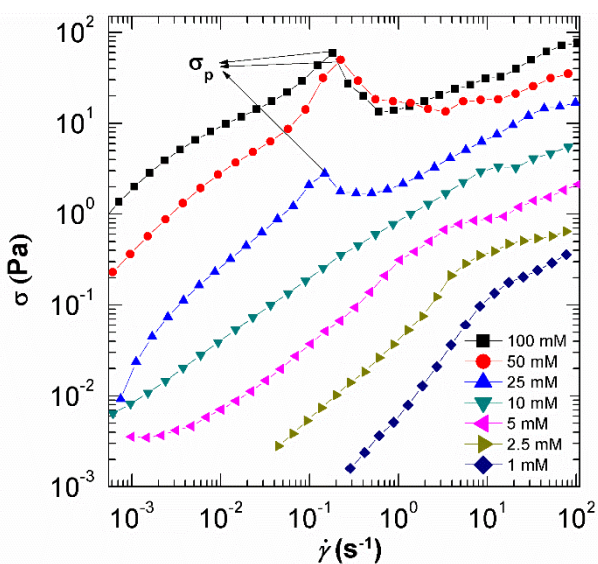

4  
5 **Figure S2** Shear stress as a function of shear rate for EMAO solution.

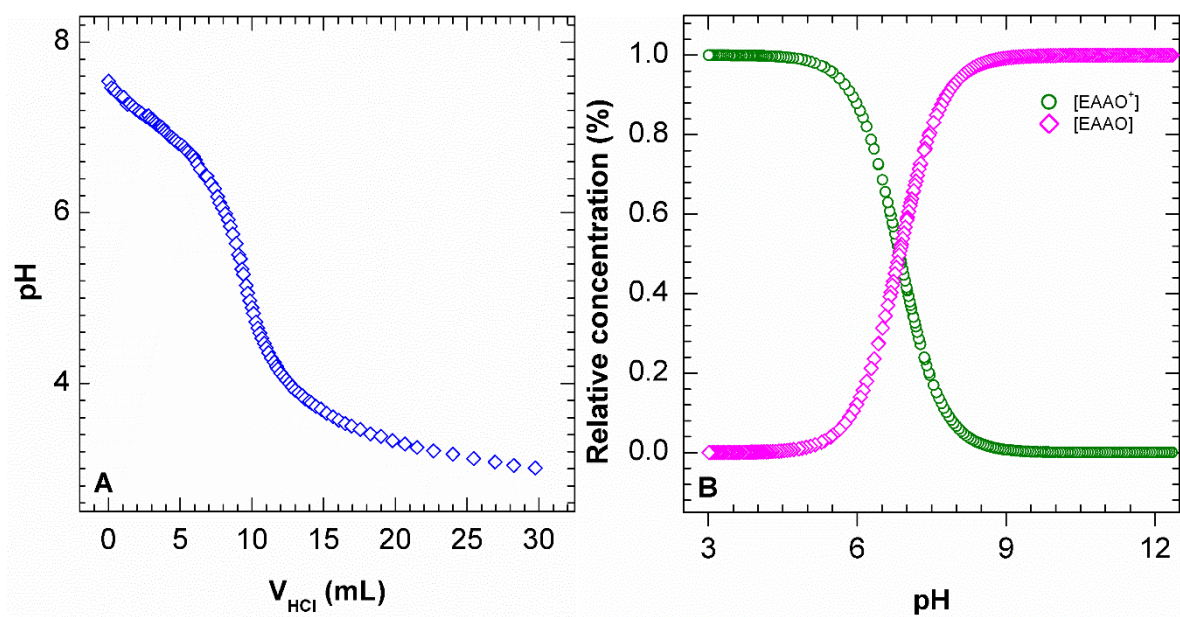

1

2 **Figure S3** (A) pH titration curve and (B) Species distribution resulting from 0.05 mM EMAO at 30 °C

3 based on a calculation from  $pK_a$  values.

4
